# Supplementary material for: Facile redox state manipulation in Cu(i) frameworks by utilisation of the redox-active tris(4-(pyridin-4-yl)phenyl)amine ligand
Source: Royal Society of Chemistry journal article supplement (doi:10.1039/c5dt01233c), 2015-01-01
Supplement: c5dt01233c1.pdf [file c5dt01233c1.pdf]

*Supplementary Information*

**Facile redox state manipulation in Cu(I) frameworks by utilisation of the redox-active tris(4-(pyridin-4-yl)phenyl)amine ligand**

*Carol Hua, Peter Turner and Deanna M. D'Alessandro\**

*School of Chemistry, The University of Sydney, New South Wales 2006, Australia. Fax: +61 (2) 9351 3329; Tel: +61 (2) 9351 3777; E-mail: [deanna.dalessandro@sydney.edu.au](mailto:deanna.dalessandro@sydney.edu.au)*

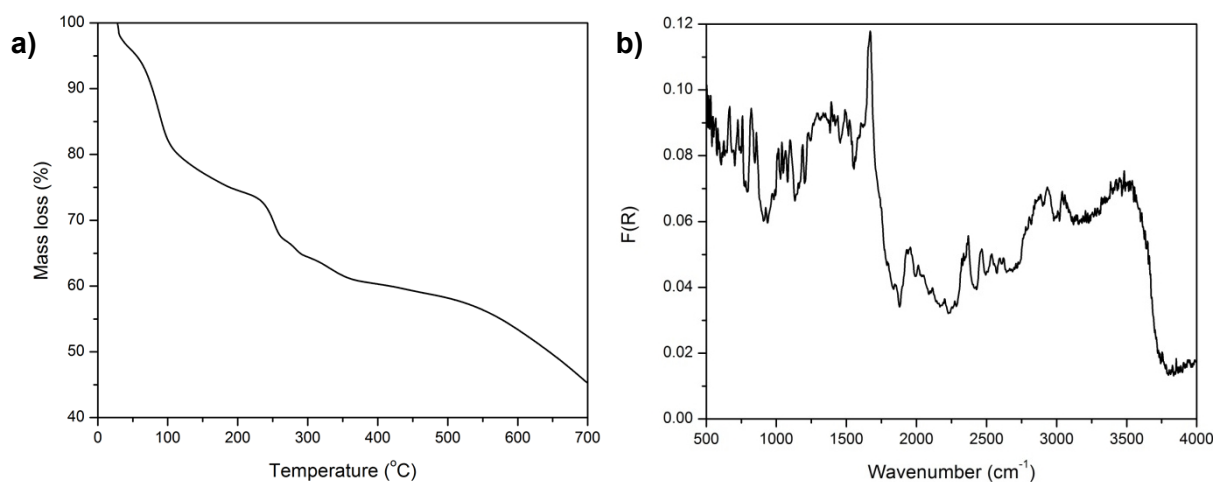

**Figure 1.** a) Thermal Gravimetric Analysis (TGA) over the range 25-700 °C and b) IR over the range 500-2000 cm<sup>-1</sup> of the [CuNPy<sub>3</sub>NO<sub>3</sub>.solvent]<sub>n</sub> framework.

## [CuNPY<sub>3</sub>NO<sub>3</sub>.solvent]<sub>n</sub> Framework

**Table 1.** Crystal data and structure refinement details for [CuNPY<sub>3</sub>NO<sub>3</sub>.solvent]<sub>n</sub>

| Parameter                               |                                                                 |
|-----------------------------------------|-----------------------------------------------------------------|
| Model Formula                           | C <sub>33</sub> H <sub>24</sub> CuN <sub>5</sub> O <sub>3</sub> |
| M/g mol <sup>-1</sup>                   | 602.11                                                          |
| Temperature (K)                         | 100(2)                                                          |
| Crystal system                          | orthorhombic                                                    |
| Space Group                             | <i>P</i> 222 <sub>1</sub> (#17)                                 |
| Crystal size (mm <sup>3</sup> )         | 0.149 × 0.098 × 0.051                                           |
| Crystal Colour                          | yellow                                                          |
| Crystal Habit                           | balde                                                           |
| a (Å)                                   | 9.0770(16)                                                      |
| b (Å)                                   | 13.831(2) Å                                                     |
| c (Å)                                   | 32.773(6) Å                                                     |
| V (Å <sup>3</sup> )                     | 4114.4(12)                                                      |
| Z                                       | 4                                                               |
| ρ <sub>calc</sub> (mg/mm <sup>3</sup> ) | 0.972                                                           |
| λ(MoKα)                                 | 0.71073 Å                                                       |
| μ(MoKα)                                 | 0.561 mm <sup>-1</sup>                                          |
| <i>T</i> (SADABS) <sub>min,max</sub>    | 0.767, 0.862                                                    |
| 2θ <sub>max</sub>                       | 56.73°                                                          |
| <i>hkl</i> range                        | -12 12, -18 18, -43 43                                          |
| Reflections collected                   | 69365/10282[R <sub>merge</sub> = 0.0754]                        |
| Data/ parameters                        | 8019/364                                                        |
| Final R indexes [all data]              | R <sub>1</sub> = 0.0540, wR <sub>2</sub> = 0.1383               |
| Goodness-of-fit on F <sup>2</sup>       | 1.104                                                           |
| Residual Extrema                        | -0.569, 0.751 e <sup>-</sup> Å <sup>-3</sup>                    |

\*R1 =  $\sum||F_o| - |F_c||/\sum|F_o|$  for  $F_o > 2\sigma(F_o)$ ; wR2 =  $(\sum w(F_o^2 - F_c^2)^2/\sum(wF_c^2)^2)^{1/2}$  all reflections.  $w=1/[\sigma^2(F_o^2)+(0.06P)^2+1.50P]$  where  $P=(F_o^2+2F_c^2)/3$

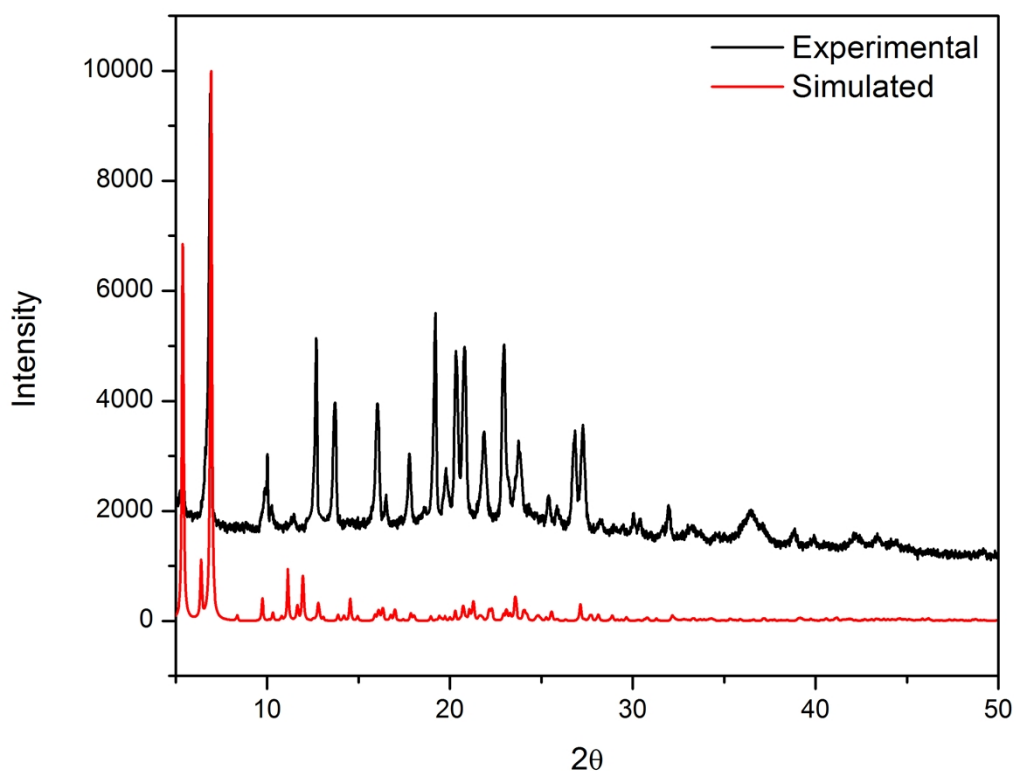

**Figure 2.** Predicted and as synthesised Powder XRD Pattern for the  $[\text{CuNPy}_3\text{NO}_3.\text{solvent}]_n$  framework.

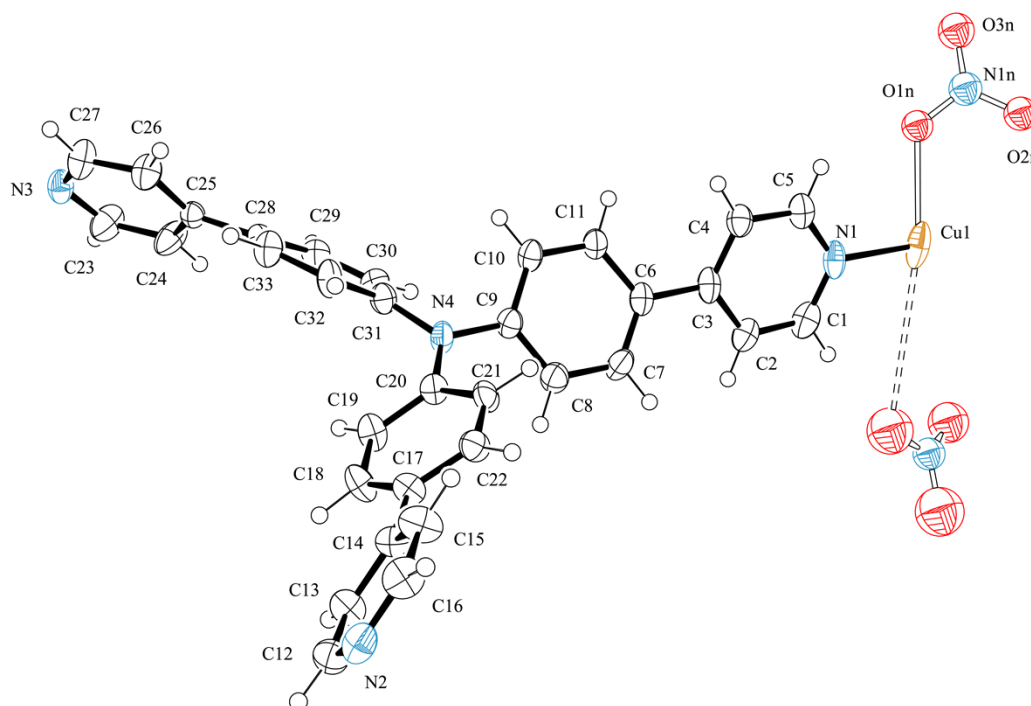

**Figure 3.** An ORTEP description of the asymmetric unit of the model obtained with SQUEEZE for  $[\text{CuNPy}_3\text{NO}_3.\text{solvent}]_n$  with 50% displacement ellipsoids.

## [CuNPy<sub>3</sub>Cl.solvent]<sub>n</sub> Framework

**Table 2.** Crystal data and structure refinement details for the [CuNPy<sub>3</sub>Cl.solvent]<sub>n</sub> framework

| Parameter                               |                                                    |
|-----------------------------------------|----------------------------------------------------|
| Model Formula                           | C <sub>33</sub> H <sub>24</sub> ClCuN <sub>4</sub> |
| M/g mol <sup>-1</sup>                   | 575.55                                             |
| Temperature (K)                         | 150.0(2)                                           |
| Crystal system                          | monoclinic                                         |
| Crystal size (mm <sup>3</sup> )         | 0.201 × 0.108 × 0.056                              |
| Crystal Colour                          | yellow                                             |
| Crystal Habit                           | block                                              |
| a (Å)                                   | 10.05130(10)                                       |
| b (Å)                                   | 28.1929(2)                                         |
| c (Å)                                   | 12.21890(10)                                       |
| β (°)                                   | 112.2430(10)                                       |
| V (Å <sup>3</sup> )                     | 3204.88(5)                                         |
| Z                                       | 4                                                  |
| ρ <sub>calc</sub> (mg/mm <sup>3</sup> ) | 1.193                                              |
| λ(CuKα)                                 | 1.5418 Å                                           |
| μ(CuKα)                                 | 1.992 mm <sup>-1</sup>                             |
| T(CRYSALISPRO) <sub>min,max</sub>       | 0.818, 1.00                                        |
| 2θ <sub>max</sub>                       | 153.19°                                            |
| hkl range                               | -12 12, -35 35, -15 14                             |
| Reflections collected                   | 62752/6714[R <sub>merge</sub> = 0.0263]            |
| Data/ parameters                        | 6371/352                                           |
| Final R indexes [all data]              | R <sub>1</sub> = 0.0592, wR <sub>2</sub> = 0.1787  |
| Goodness-of-fit on F <sup>2</sup>       | 1.047                                              |
| Residual Extrema                        | -0.821, 1.859 e <sup>-</sup> Å <sup>-3</sup>       |

\*  $R_1 = \frac{\sum ||F_o| - |F_c||}{\sum |F_o|}$  for  $F_o > 2\sigma(F_o)$ ;  $wR_2 = \frac{(\sum w(F_o^2 - F_c^2)^2)}{\sum (wF_c^2)^2}^{1/2}$

all reflections.  $w=1/[\sigma^2(F_o^2)+(0.06P)^2+1.50P]$  where  $P=(F_o^2+2F_c^2)/3$

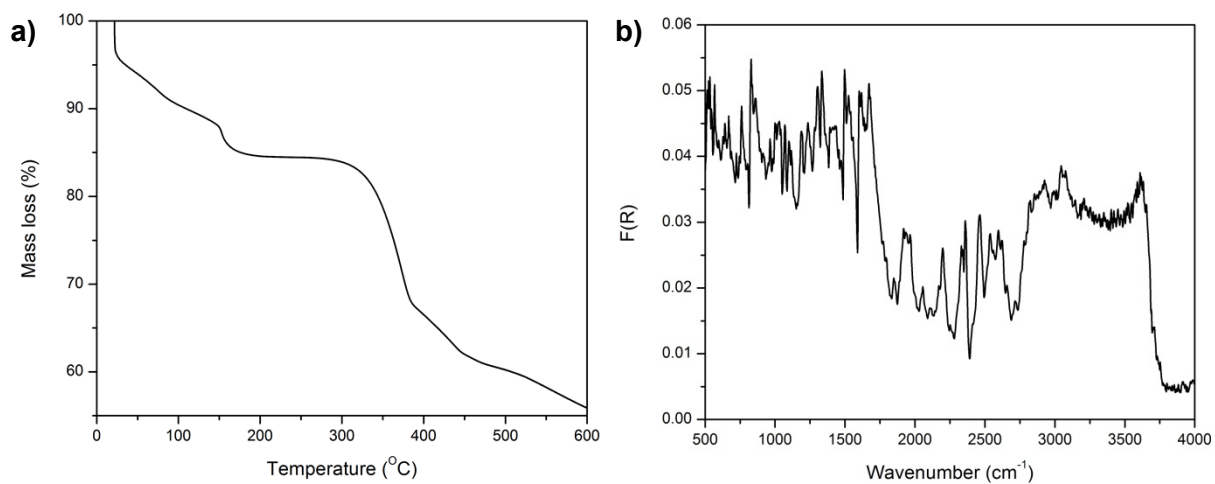

**Figure 4.** a) TGA over the range 25-600 °C and b) IR spectrum over the range 500-4000  $\text{cm}^{-1}$  of the  $[\text{CuNPy}_3\text{Cl}\cdot\text{solvent}]_n$  framework.

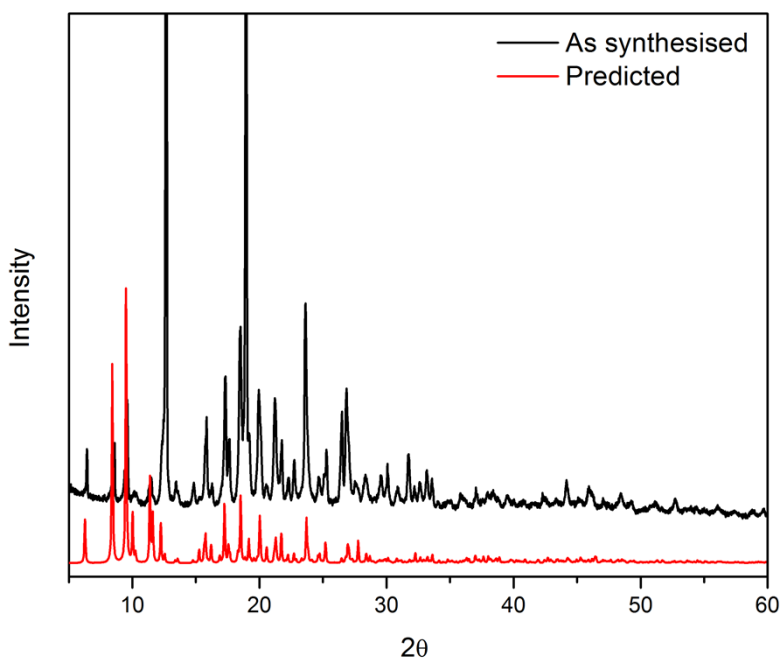

**Figure 5.** PXRD of the as synthesised  $[\text{CuNPy}_3\text{Cl}\cdot\text{solvent}]_n$  framework in comparison with the predicted pattern from the structure determination.

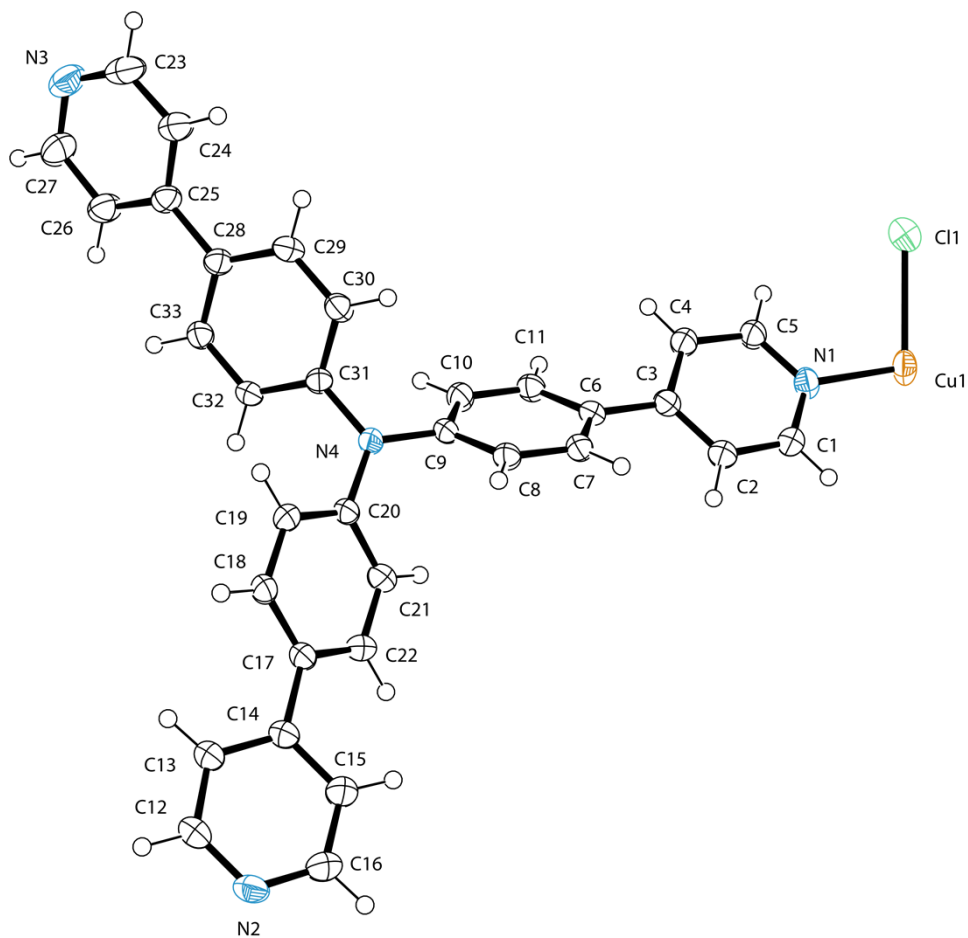

**Figure 6.** An ORTEP description of the asymmetric unit of the model obtained with SQUEEZE for [CuNPY<sub>3</sub>Cl.solvant]<sub>n</sub> with 50% displacement ellipsoids.
